# Supplementary material
Source: PubMed Central journal article supplement (PMC2737085)

**Supporting Information for:**

**Physical Interaction between Replication Protein A (RPA) and MRN: Involvement of RPA2 Phosphorylation and the N-terminus of RPA1**

Greg Oakley, Kristin Tillison, Stephen Opiyo, Jason Glanzer, Jeffrey M. Horn and Steve M. Patrick

**Supplemental Fig. S1.** Purification of recombinant MRN proteins. A, Coomassie stained gel of the MRN purification pools. Both pools were used in the manuscript for various assays. B, Western blot of Mre11, Nbs1, MN and the MRN proteins.

**Supplemental Fig. S2.** Purification of recombinant RPA. A, Western blot of RPA preps. Lane 1, RPA1 N-terminal truncation,  $\Delta$ NRPA1; lane 2, p32/p14 (RPA2/3); lane 3, wild type RPA with p70, p32 and p14; lane 4, hyperphosphorylated RPA, indicative of the shifted p32 subunit.

# MRN Purification

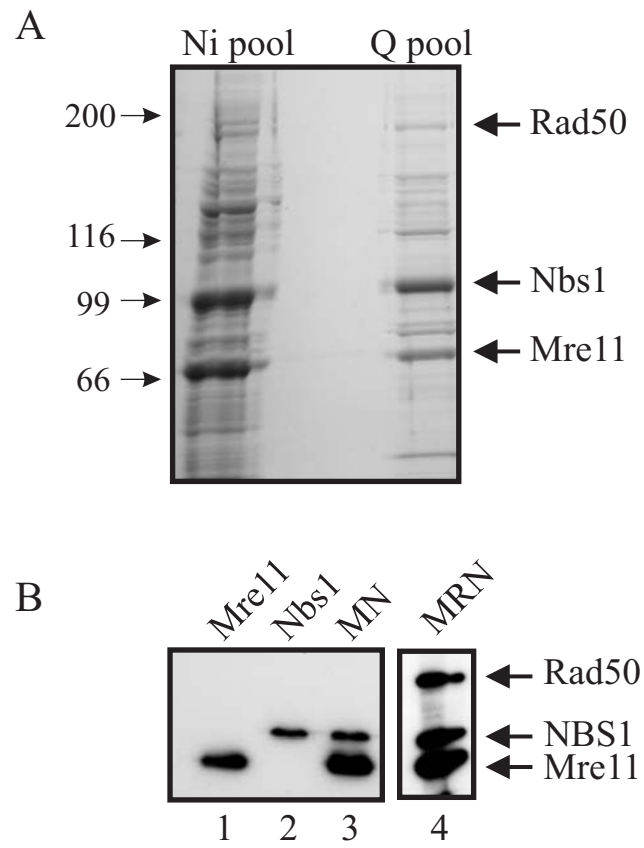

# RPA Purification (western blot)

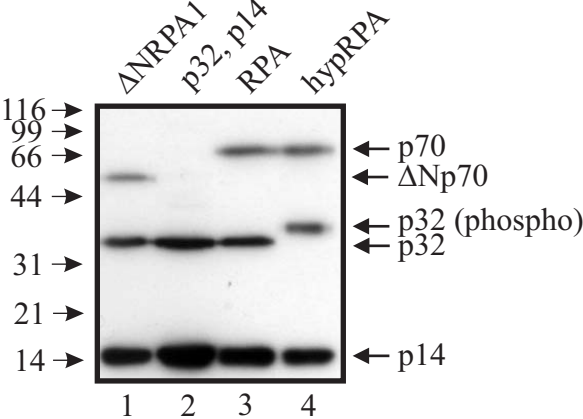

Supplement: NIHMS133552-supplement-1_si_001.pdf [file NIHMS133552-supplement-1_si_001.pdf]
